# Supplementary material for: miR-182-5p contributes to radioresistance in nasopharyngeal carcinoma by regulating BNIP3 expression
Source: PubMed Central journal article supplement — Mol Med Rep. 2020 Dec 10;23(2):130. doi: 10.3892/mmr.2020.11769 (PMC7751459; doi:10.3892/mmr.2020.11769), 2020-12-10
Supplement: Supplementary_Data.pdf [file Supplementary_Data.pdf]

Table SI. Sequences of vectors in this study.

| Primer                           | Sequences                                                        |
|----------------------------------|------------------------------------------------------------------|
| miR-182-5p mimic (double strand) | 5'-UUUGGCAAUGGUAGAACUCACACU-3'<br>5'-UGUGAGUUCUACCAUUGCCAAAUU-3' |
| Mimic-NC (double strand)         | 5'-UUCUCCGAACGAACGUGUCACGUUU-3'<br>5'-ACGUGACACGUUCGGAGAAUU-3'   |
| miR-182-5p inhibitor             | 5'-AGUGUGAGUUCUACCAUUGCCAAA-3'                                   |
| Inhibitor-NC si-BNIP3            | 5'-CAGUACUUUUGUGUAGUACAA-3'                                      |
| Forward sequence                 | 5'-GAAAGUAAAUACUAUUUAUAUA-3'                                     |
| Reverse sequence                 | 5'-UAUAAUAGUAUUUACUUUCAG-3'                                      |
| si-NC                            | 5'-UUCUUCGAACGUGUCACGUUU-3'                                      |

miR, microRNA; si, small interfering; NC, negative control.

Table SII. The identified 53 DEGs from GSE48053 data profile with the selection criteria of adjusted P-value &lt;0.05.

| Probe ID           | Adjusted P-value | logFC       | Gene symbol  | Gene title                                                      |
|--------------------|------------------|-------------|--------------|-----------------------------------------------------------------|
| 204614_at          | 0.0218           | -3.07       | SERPINB2     | Serpin family B member 2                                        |
| 209351_at          | 0.0268           | -2.75       | KRT14        | Keratin 14                                                      |
| 228956_at          | 0.0289           | -2.7        | UGT8         | UDP glycosyltransferase 8                                       |
| 213764_s_at        | 0.0485           | -2.62       | MFAP5        | Microfibrillar associated protein 5                             |
| 1555854_at         | 0.0406           | -2.34       | LOC101930400 | Aldo-keto reductase family 1 member C2-like                     |
| 237552_at          | 0.0452           | -2.28       | LOC100505817 | Uncharacterized LOC100505817                                    |
| 204823_at          | 0.0406           | -1.75       | NAV3         | Neuron navigator 3                                              |
| 201825_s_at        | 0.0289           | -1.71       | SCCPDH       | Saccharopine dehydrogenase (putative)                           |
| 218435_at          | 0.0495           | -1.67       | DNAJC15      | DnaJ heat shock protein family (Hsp40) member C15               |
| 1556097_at         | 0.0357           | -1.62       | HOMER2       | Homer scaffolding protein 2                                     |
| 228850_s_at        | 0.0374           | -1.49       | SLIT2        | Slit guidance ligand 2                                          |
| 224032_x_at        | 0.0406           | -1.49       | SPANXA2      | SPANX family member A2                                          |
| 209125_at          | 0.0495           | -1.46       | KRT6A        | Keratin 6A                                                      |
| 223784_at          | 0.0406           | -1.42       | TMEM27       | Transmembrane protein 27                                        |
| 227037_at          | 0.0452           | -1.38       | PLD6         | Phospholipase D family member 6                                 |
| 239108_at          | 0.0452           | -1.37       | FAR2         | Fatty acyl-CoA reductase 2                                      |
| 1569582_at         | 0.0455           | -1.28       | AADACP1      | Arylacetamide deacetylase pseudogene 1                          |
| 207526_s_at        | 0.0495           | -1.23       | IL1RL1       | Interleukin 1 receptor like 1                                   |
| 202784_s_at        | 0.0488           | -1.2        | NNT          | Nicotinamide nucleotide transhydrogenase                        |
| 207543_s_at        | 0.0455           | 1.17        | P4HA1        | Prolyl 4-hydroxylase subunit alpha 1                            |
| <b>201848_s_at</b> | <b>0.0455</b>    | <b>1.19</b> | <b>BNIP3</b> | <b>BCL2 interacting protein 3</b>                               |
| 219147_s_at        | 0.0452           | 1.27        | NMRK1        | Nicotinamide riboside kinase 1                                  |
| 201811_x_at        | 0.0406           | 1.34        | SH3BP5       | SH3 domain binding protein 5                                    |
| 209173_at          | 0.0406           | 1.34        | AGR2         | Anterior gradient 2, protein disulphide isomerase family member |
| 223571_at          | 0.0452           | 1.35        | C1QTNF6      | C1q and tumor necrosis factor related protein 6                 |
| 209118_s_at        | 0.0374           | 1.43        | TUBA1A       | Tubulin alpha 1a                                                |
| 219806_s_at        | 0.0406           | 1.46        | SMCO4        | Single-pass membrane protein with coiled-coil domains 4         |
| 222088_s_at        | 0.0455           | 1.5         | SLC2A14      | Solute carrier family 2 member 14                               |
| 202769_at          | 0.0374           | 1.53        | CCNG2        | Cyclin G2                                                       |
| 219232_s_at        | 0.0374           | 1.54        | EGLN3        | Egl-9 family hypoxia inducible factor 3                         |
| 204298_s_at        | 0.0357           | 1.55        | LOX          | Lysyl oxidase                                                   |
| 202022_at          | 0.0406           | 1.55        | ALDOC        | Aldolase, fructose-bisphosphate C                               |
| 204595_s_at        | 0.0406           | 1.59        | STC1         | Stanniocalcin 1                                                 |
| 202619_s_at        | 0.0383           | 1.62        | PLOD2        | Procollagen-lysine,2-oxoglutarate 5-dioxygenase 2               |
| 243386_at          | 0.0452           | 1.62        | CASZ1        | Castor zinc finger 1                                            |
| 205319_at          | 0.0289           | 1.7         | PSCA         | Prostate stem cell antigen                                      |
| 226535_at          | 0.0455           | 1.73        | LOC100505984 | Uncharacterized LOC100505984                                    |
| 202499_s_at        | 0.0406           | 1.74        | SLC2A3       | Solute carrier family 2 member 3                                |
| 213397_x_at        | 0.0357           | 1.79        | RNASE4       | Ribonuclease A family member 4                                  |
| 226325_at          | 0.0258           | 1.86        | ADSSL1       | Adenylosuccinate synthase like 1                                |
| 242907_at          | 0.0374           | 1.87        | GBP2         | Guanylate binding protein 2                                     |
| 218901_at          | 0.0374           | 1.92        | PLSCR4       | Phospholipid scramblase 4                                       |
| 209189_at          | 0.0452           | 2.13        | FOS          | Fos proto-oncogene, AP-1 transcription factor subunit           |
| 202912_at          | 0.0495           | 2.15        | ADM          | Adrenomedullin                                                  |
| 203980_at          | 0.0419           | 2.21        | FABP4        | Fatty acid binding protein 4                                    |
| 201313_at          | 0.0218           | 2.32        | ENO2         | Enolase 2                                                       |
| 230748_at          | 0.0258           | 2.47        | SLC16A6      | Solute carrier family 16 member 6                               |
| 202238_s_at        | 0.0374           | 2.71        | LOC101928916 | Uncharacterized LOC101928916                                    |
| 207761_s_at        | 0.0218           | 2.87        | METTL7A      | Methyltransferase like 7A                                       |
| 215444_s_at        | 0.0455           | 2.92        | TRIM31       | Tripartite motif containing 31                                  |
| 212143_s_at        | 0.0406           | 3.2         | IGFBP3       | Insulin like growth factor binding protein 3                    |
| 1558034_s_at       | 0.0455           | 3.4         | CP           | Ceruloplasmin (ferroxidase)                                     |
| 218729_at          | 0.0257           | 4.51        | LXN          | Latexin                                                         |

FC, fold change; bold, gene of interest.

Table SIII. Top conserved targets of BNIP3 predicted by TargetScan Human 7.2.

| miRNA            | Position<br>in the UTR | Seed match | Context++ score | Context++<br>score percentile | Weighted<br>context++ score |
|------------------|------------------------|------------|-----------------|-------------------------------|-----------------------------|
| hsa-miR-182-5p   | 824-831                | 8mer       | -0.42           | 98                            | -0.36                       |
| hsa-miR-411-5p.1 | 783-789                | 7mer-m8    | -0.3            | 98                            | -0.26                       |
| hsa-miR-96-5p    | 825-831                | 7mer-1A    | -0.23           | 91                            | -0.2                        |
| hsa-miR-1271-5p  | 825-831                | 7mer-1A    | -0.17           | 86                            | -0.15                       |

miRNA, microRNA; has, human.
